# Supplementary material
Source: PubMed Central journal article supplement (PMC2077051)

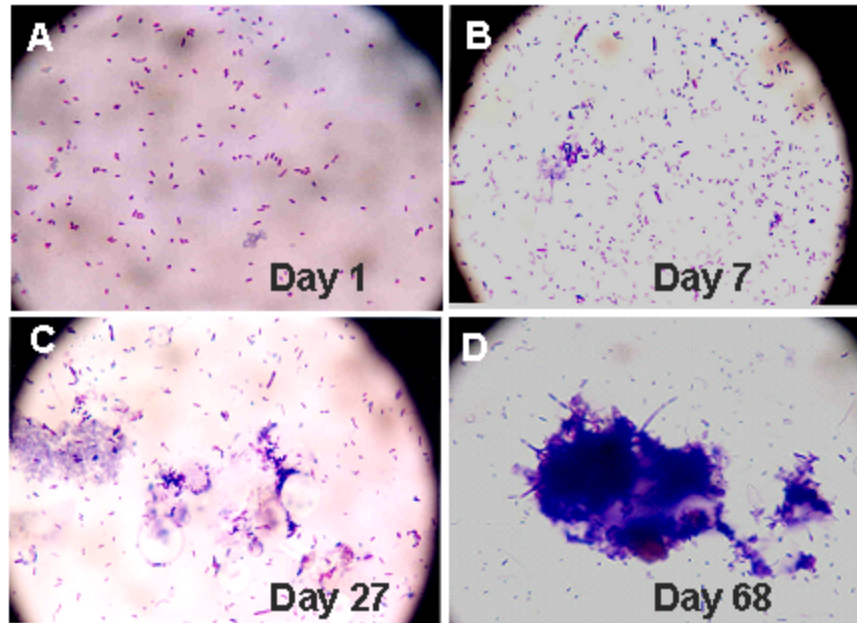

Supplement: pnas_0705599104_1.pdf [file pnas_0705599104_1.pdf]

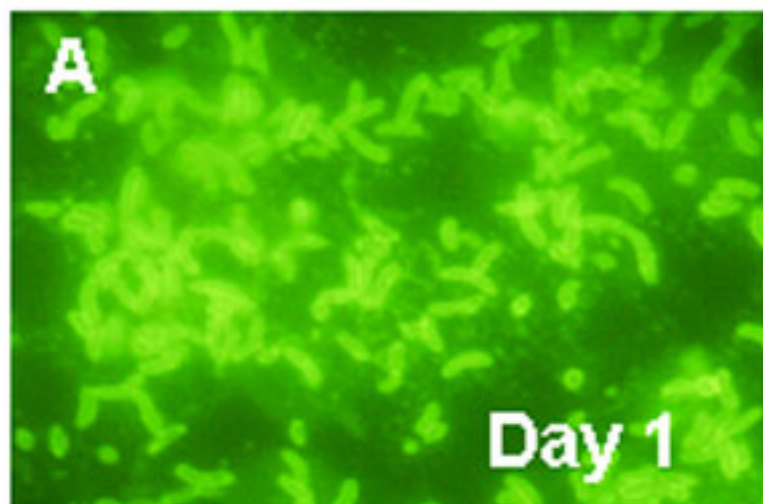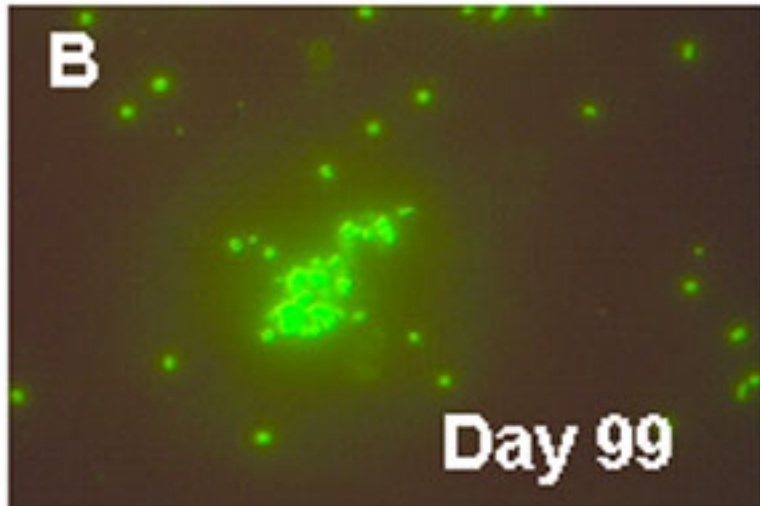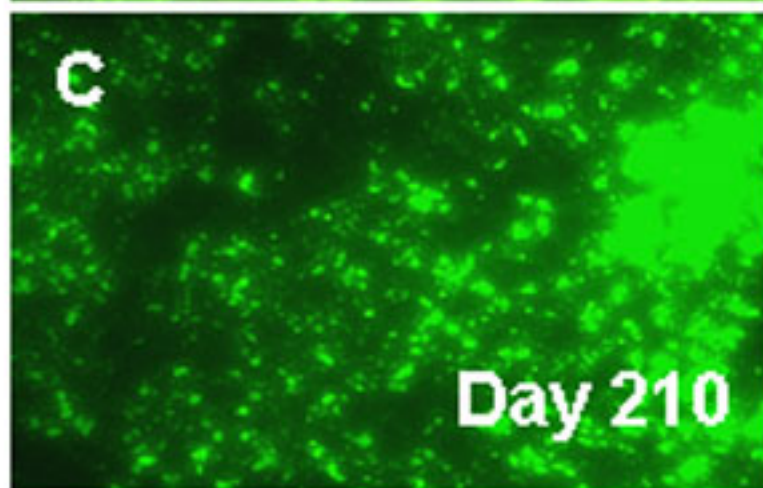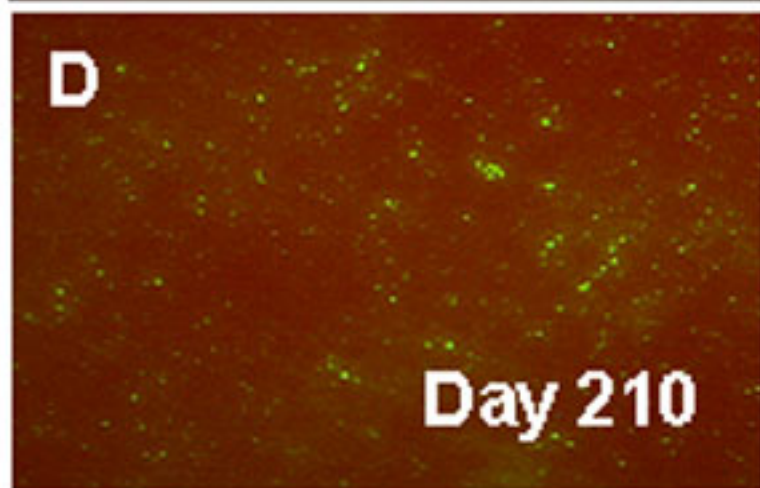

Supplement: pnas_0705599104_2.pdf [file pnas_0705599104_2.pdf]

**A****Day 1****B****Day 7****C****Day 54****D****Day 99**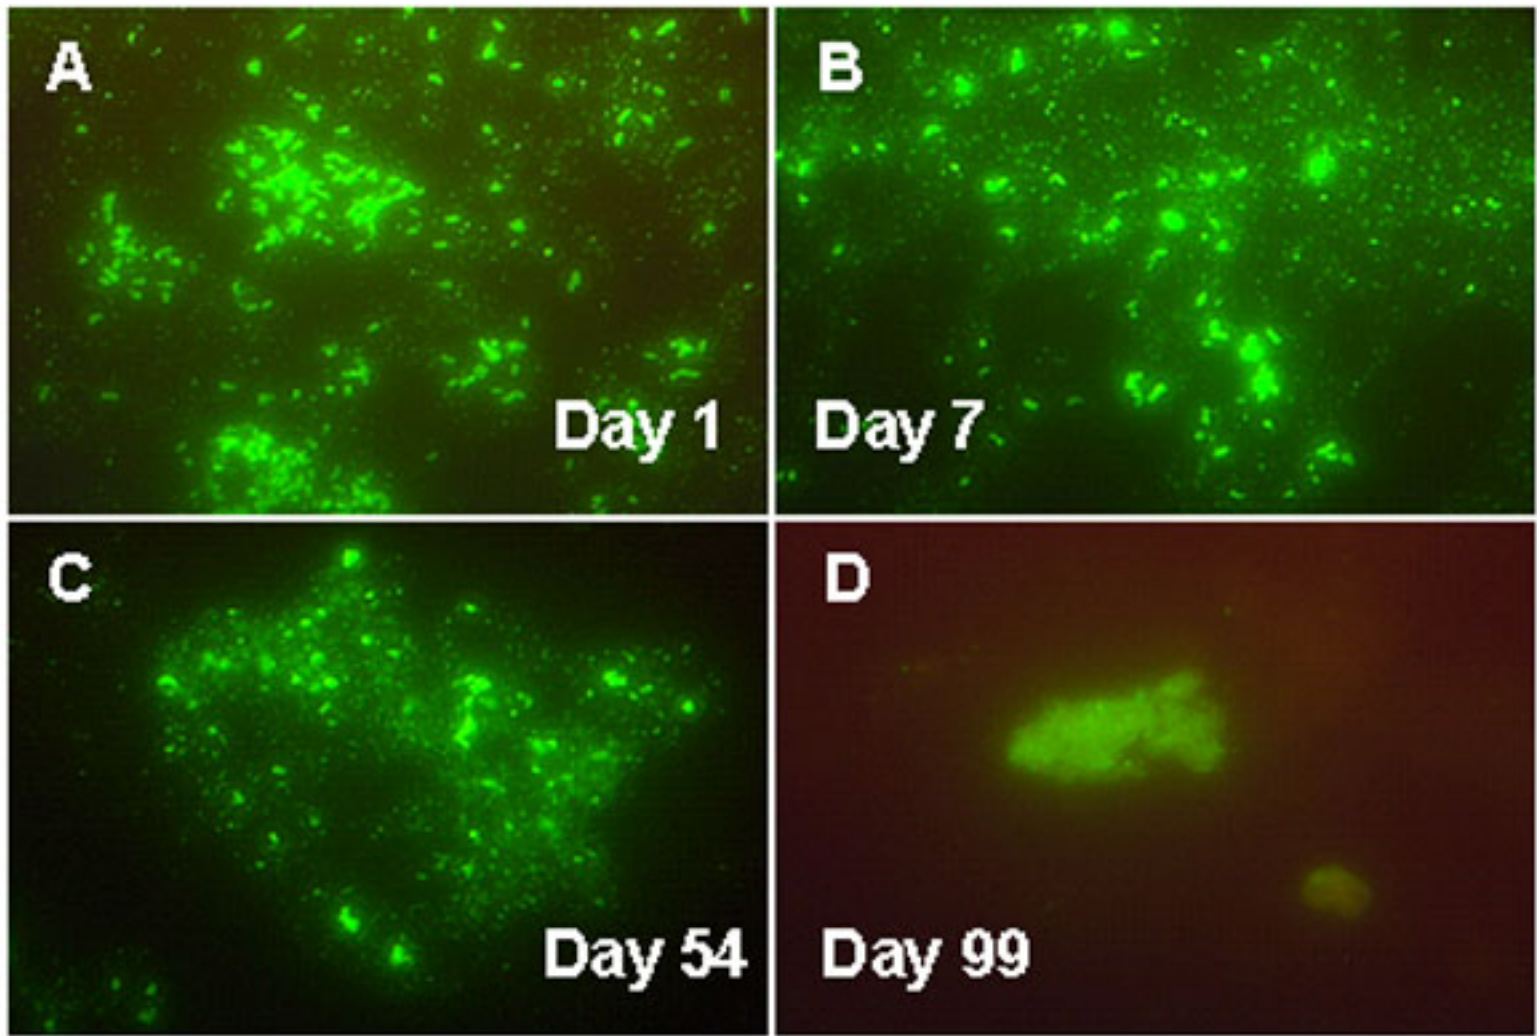

Supplement: pnas_0705599104_3.pdf [file pnas_0705599104_3.pdf]
